# Supplementary material
Source: publisher figshare collection journal article supplement (https://tandf.figshare.com/articles/dataset/_/5942839)
Supplement: Supplementary file 1 [file 1]

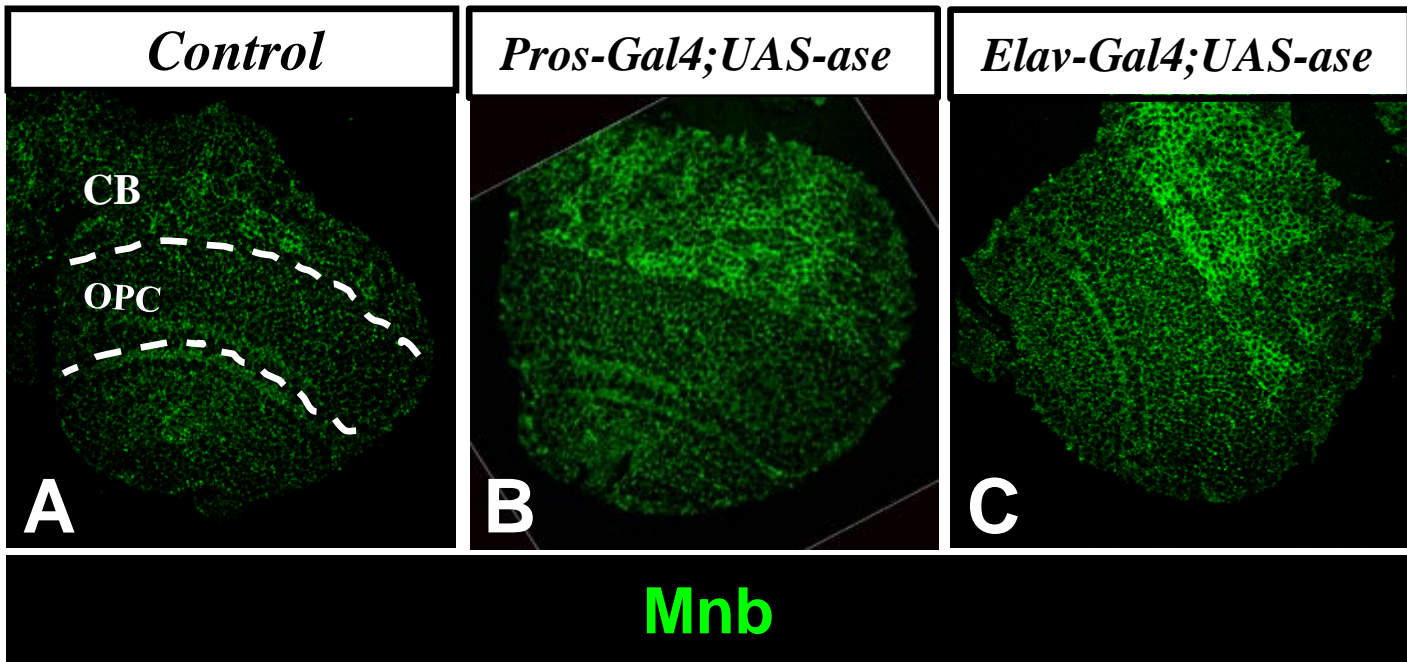

**Suppl. Figure S1. Additional data of the effect of GoF of Ase on Mnb expression.**

A, B, C. Confocal images from a ventro-anterior orientation through brain hemispheres of *pros-Gal4;UAS-ase*, and *elav-Gal4;UAS-ase* late third-instar larvae, as indicated, showing an increase in Mnb immunolabeling intensity, particularly in the CB area, compared to the control sample.
