# Supplementary material
Source: publisher figshare collection journal article supplement (https://tandf.figshare.com/articles/dataset/_/5942839)
Supplement: Supplementary file 2 [file 1]

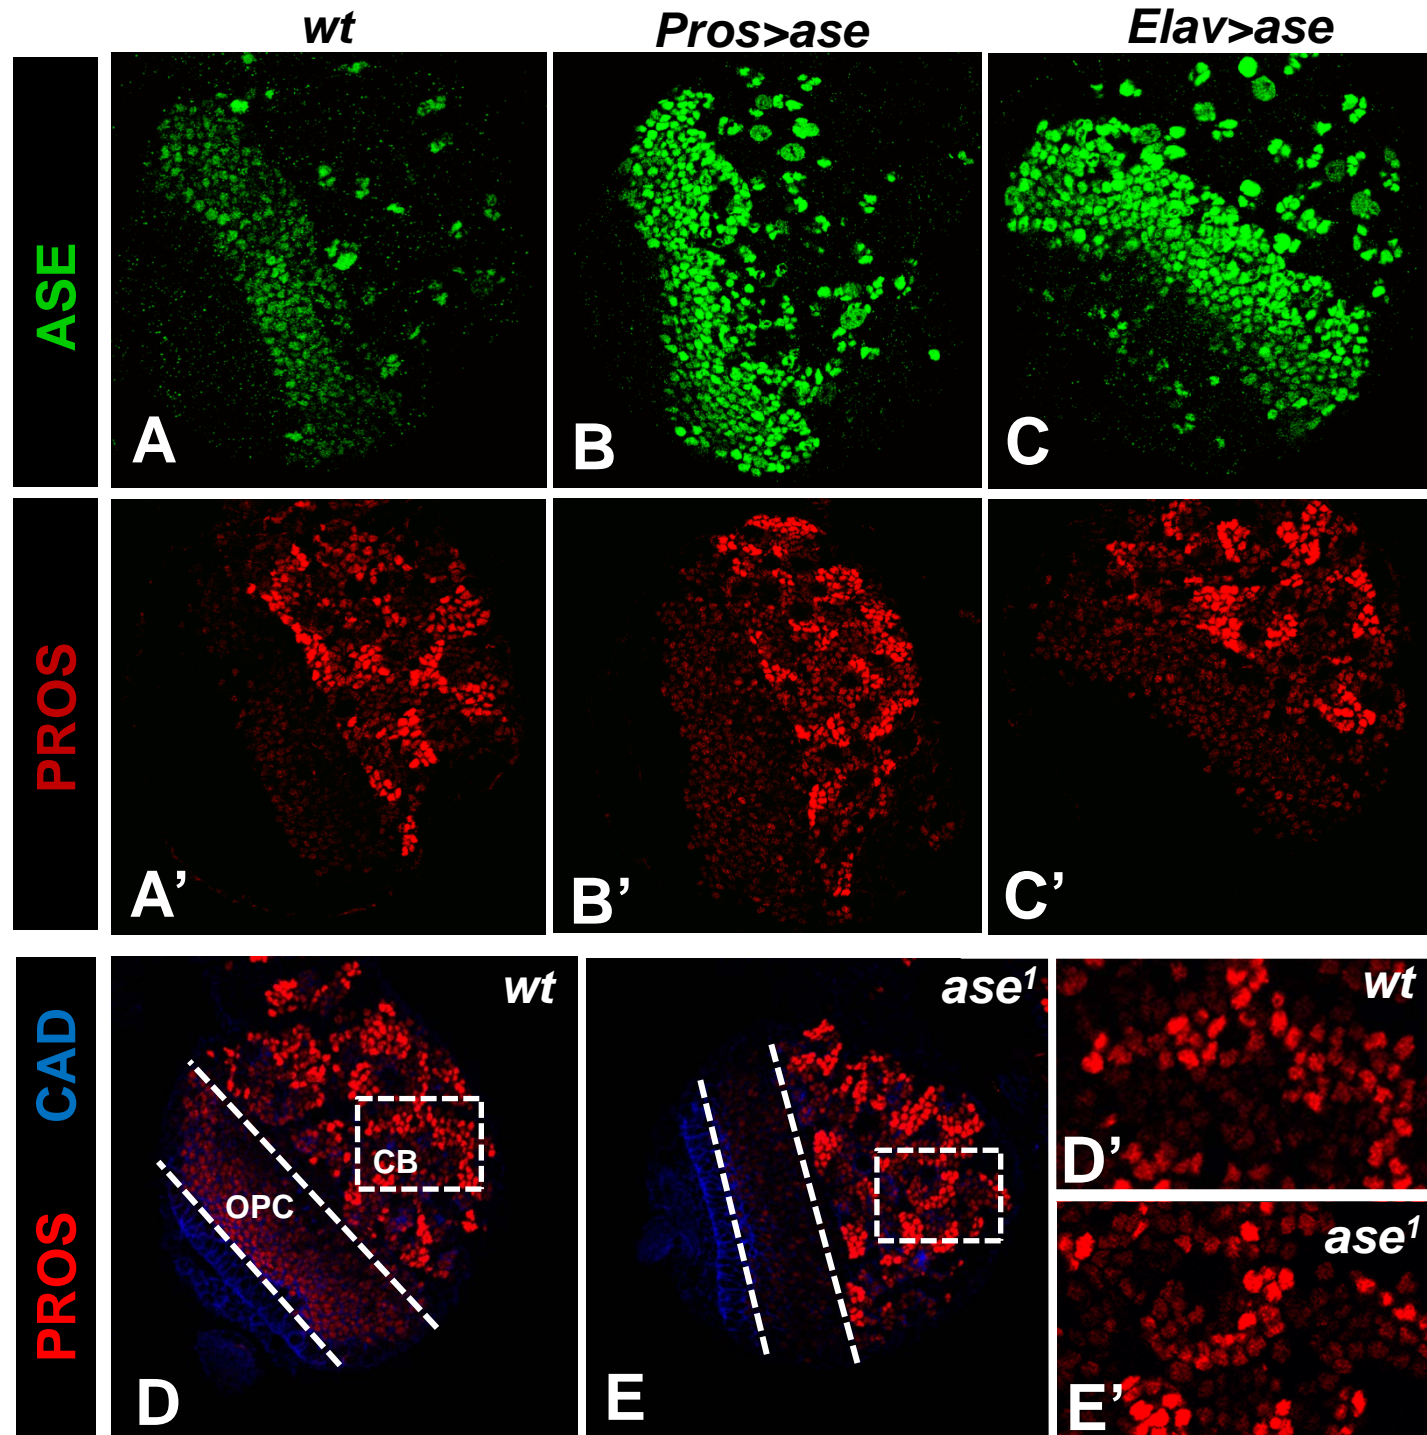

**Suppl. Fig. S2. The expression of prospero is not altered in *ase* LoF and GoF mutants.** Confocal images taken from a ventro-anterior orientation through brain hemispheres of *wt*, *pros-Gal4; UAS-ase* and *elav-Gal4; UAS-ase* late third-instar larvae showing Ase (A-C) and Pros (A'-C') immunolabeling. Notice the strong increase in Ase labeling in the mutant lobes whereas no apparent change is observed in Pros labeling compared to the *wt* sample. D, E. Similar confocal images of *wt* and *ase<sup>1</sup>* brains showing immunolabeling of Pros and Cadherin (Cad, which marks OPC NE cells). D', E' High magnification images of equivalent framed areas of the CB showing that Pros labeling is not altered in *ase<sup>1</sup>* compared to the *wt* sample.
